# Supplementary material
Source: PubMed Central journal article supplement (PMC6093777)
Supplement: NIHMS964943-supplement-1.pdf [file NIHMS964943-supplement-1.pdf]

**Supplemental Table S2:** The axonal projection of various populations of primary sensory neurons to the conjunctiva, cornea and skin

| Table 1: Mouse lines                                                     | Conjunctiva | Cornea | Back Skin |
|--------------------------------------------------------------------------|-------------|--------|-----------|
| <i>Pirt</i> <sup>GCaMP3/+</sup>                                          | +++++       | +++++  | +++++     |
| <i>Nav1.8: Scn10a</i> <sup>cre/+</sup> ; <i>Rosa26</i> <sup>tdT/+</sup>  | +++         | +++++  | ++++      |
| <i>Trpv1</i> <sup>ALPP/+</sup>                                           | +++         | ++++   | +++       |
| <i>Trpm8</i> <sup>gfp/+</sup>                                            | +           | ++++   | ++        |
| <i>Mrgprd</i> <sup>egfp/+</sup>                                          | +           | absent | +++       |
| <i>Mrgpra3</i> <sup>cre/+</sup> ; <i>Rosa26</i> <sup>tdT/+</sup>         | +++         | absent | +++       |
| <i>Sst</i> <sup>cre/+</sup> ; <i>Rosa26</i> <sup>tdT/+</sup>             | absent      | absent | +++       |
| <i>Vglut3: Slc17a8</i> <sup>cre/+</sup> ; <i>Rosa26</i> <sup>tdT/+</sup> | absent      | ++     | +++       |
| CGRP (immunofluorescence)                                                | +++         | ++++   | +++       |

## Supplemental Figures

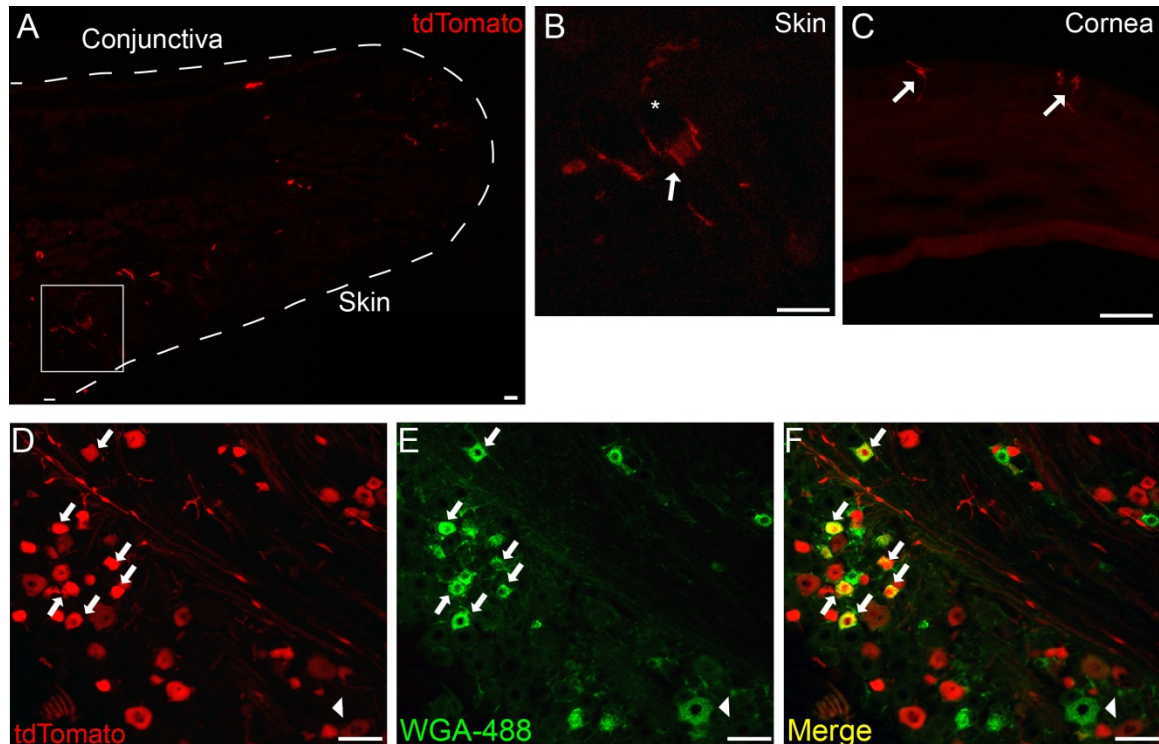

**Fig. S1:** Low-threshold mechanosensitive C fiber neurons that express vesicular glutamate transporter 3 (VGLUT3, gene *Slc17a8*) do not innervate the conjunctiva (A) *Slc17a8<sup>cre/+</sup>; Rosa26<sup>tdTomato/+</sup>* (*Slc17a8<sup>tdTomato/+</sup>*) sensory fibers in a section of an eyelid. (B) High magnification view of boxed area in (A). Asterisk indicates a hair follicle. Arrow indicates *Slc17a8<sup>tdTomato/+</sup>* sensory fibers (C) *Slc17a8<sup>tdTomato/+</sup>* sensory fibers in a section of cornea. Arrows indicate VGLUT3<sup>+</sup> sensory fibers. (D-F) WGA-mediated retrograde labeling of corneal afferent neurons in *Slc17a8<sup>tdTomato/+</sup>* mice. Arrows indicate co-localization of tdTomato<sup>+</sup> neurons (red) and WGA (green) in the section of trigeminal ganglion. Arrowhead indicates a large diameter neuron labelled only by WGA. Representative images shown were chosen from 3 trigeminal ganglia imaged from three mice. Scale bars: 50  $\mu$ m.

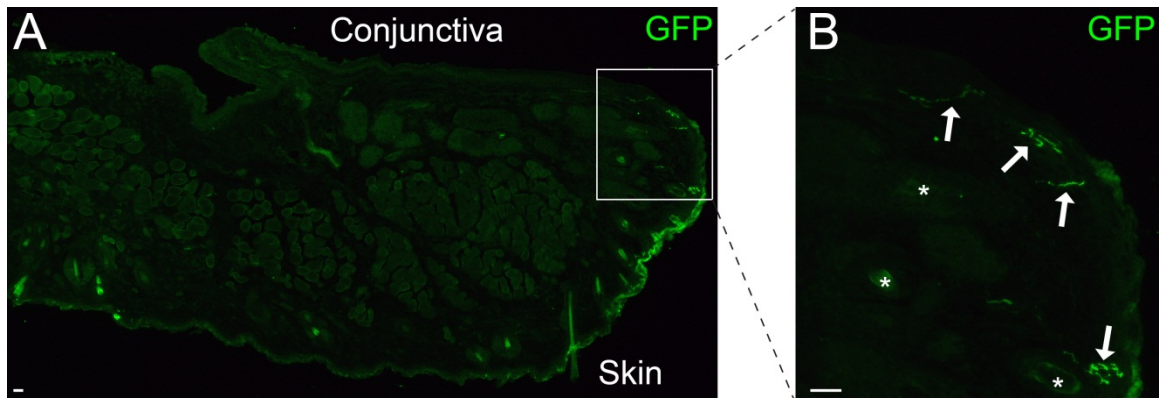

**Fig. S2:** Sparse innervation of TRPM8<sup>+</sup> sensory fibers in the conjunctiva (A) *Trpm8*<sup>gfp/+</sup> sensory fibers in a section of an eyelid. (B) High magnification view of boxed area in (A). Arrows indicate GFP<sup>+</sup> fibers. Asterisks indicate hair follicles in the eyelid skin. Representative images were chosen from 6 conjunctivae imaged from three mice. Scale bars: 50  $\mu$ m.

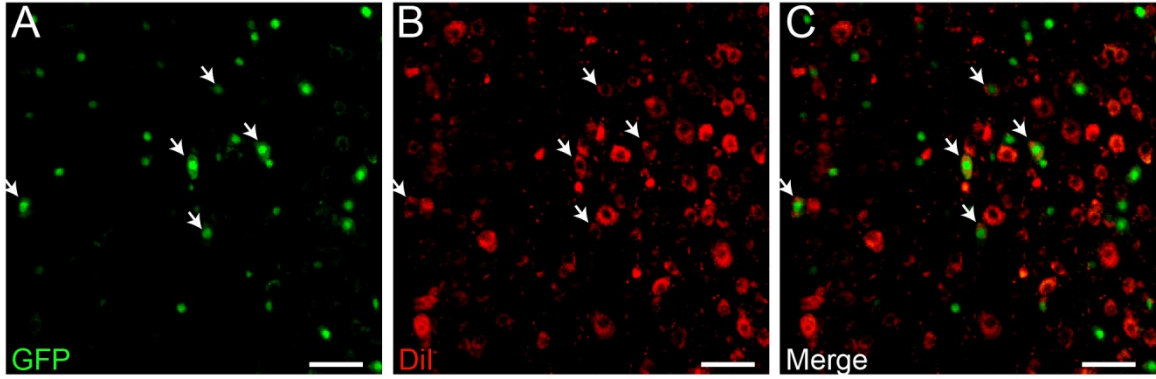

**Fig. S3:** A group of conjunctival afferent neurons express MrgprA3. **(A-C)** Dil-mediated retrograde labeling of conjunctival afferent neurons in *MrgprA3<sup>gfp-cre</sup>* mice. Arrows indicate co-localization of GFP<sup>+</sup> neurons (green) and Dil (red) in the section of trigeminal ganglion. Representative images shown were chosen from 3 trigeminal ganglia imaged from 3 mice. Scale bars: 50  $\mu$ m.

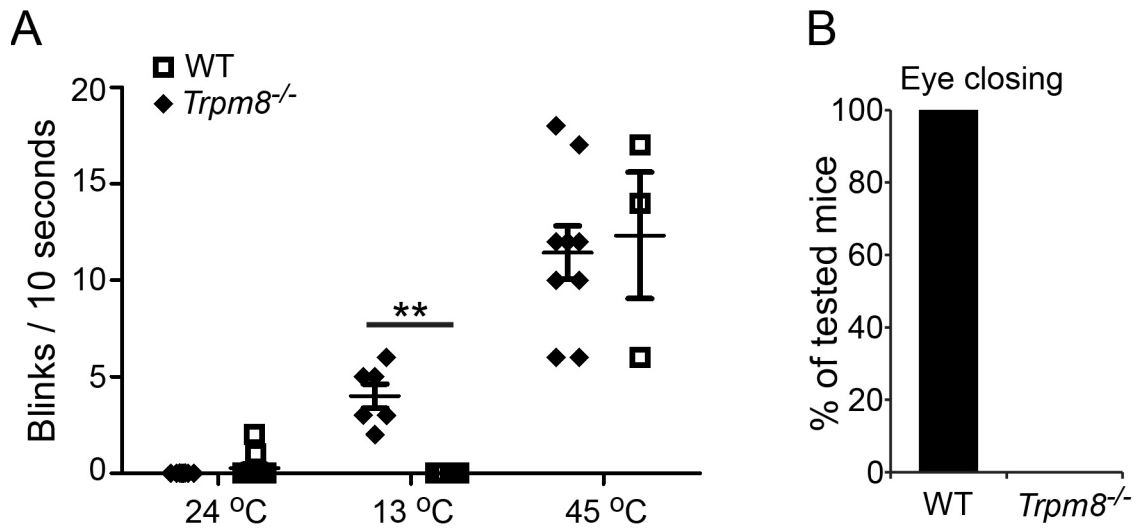

**Fig. S4:** TRPM8 mediates ocular pain induced by the cold temperature. **(A)** Blinking responses to air flow (0.5 L/min) at different temperatures in WT (n=11, 6, 9, respectively) and *Trpm8*<sup>-/-</sup> mice (n=11, 8, 3, respectively). Data are expressed as mean±s.e.m. Statistical analysis by two tailed Student's t-test (\*\*P=0.0015). **(B)** Eye-closing behavior to air flow (0.5 L/min) at different temperature in WT (n=6) and *Trpm8*<sup>-/-</sup> mice (n=3).

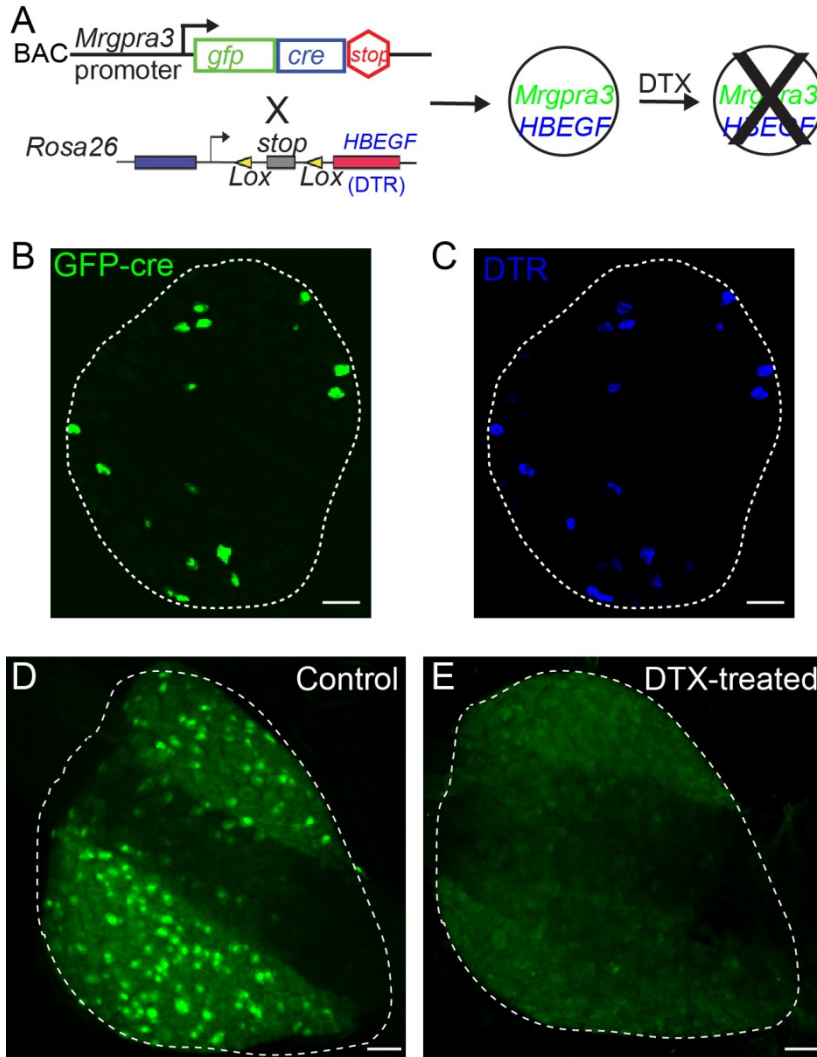

**Fig. S5:** Genetic- and temporal-specific ablation of MrgprA3<sup>+</sup> neurons. **(A)** Combining Cre-Lox and diphtheria toxin receptor (DTR, gene *HBEGF*) approaches to ablate MrgprA3<sup>+</sup> neurons. **(B-C)** All *Mrgpra3*<sup>gfp-cre</sup> neurons (green) express DTR (blue). No ectopic DTR expression was detected. **(D-E)** Stacked confocal microscopy images of the whole DRG from *Mrgpra3*<sup>gfp-cre</sup>; *Rosa*<sup>HBEGF/+</sup> mice before **(D)** and after **(E)** diphtheria toxin treatment. Representative images were chosen from DRGs imaged from 3 mice. Scale bars: 50  $\mu$ m.

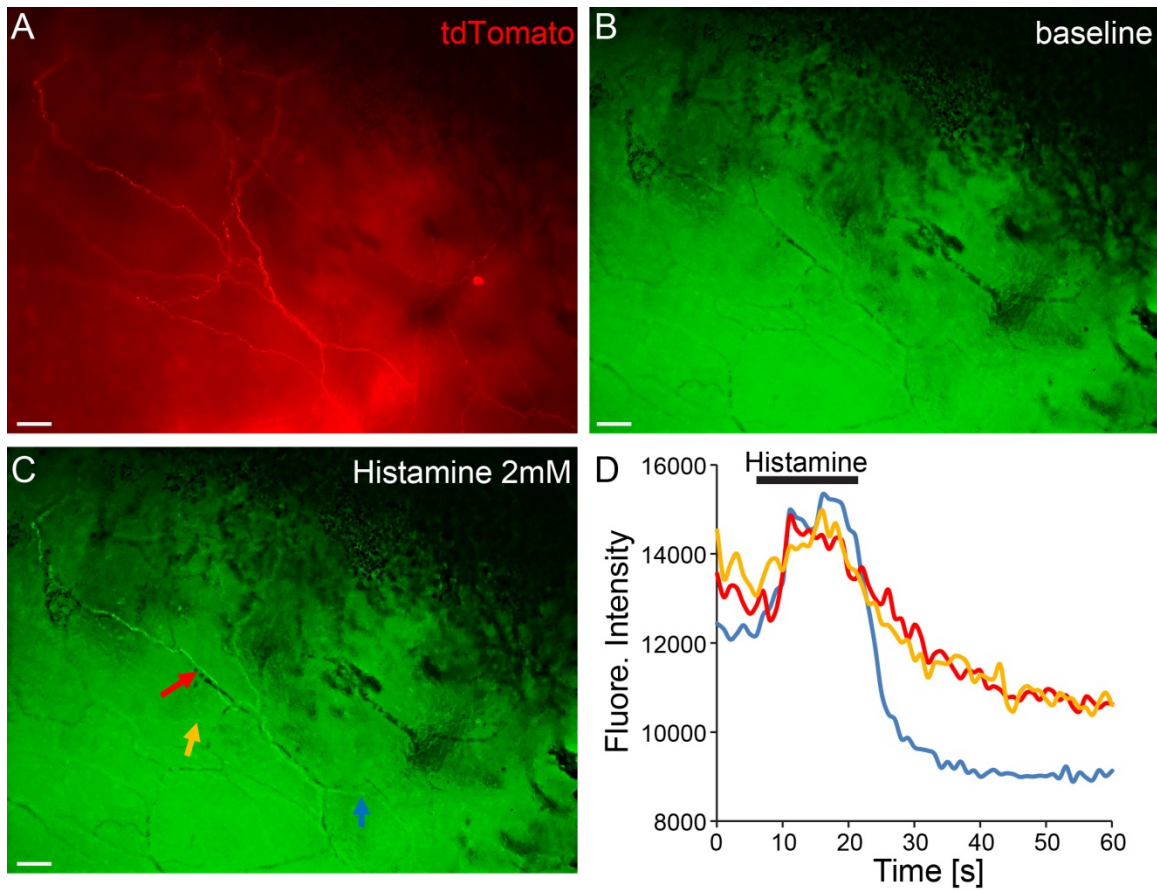

**Fig. S6:** MrgprA3<sup>+</sup> conjunctival fibers response to histamine. (A) *Mrgpra3*<sup>gfp-cre/+</sup>; *Rosa26*<sup>tdTomato/+</sup>; *Pirt*<sup>GCaMP3/+</sup> sensory fibers (red) in the conjunctiva. (B) Baseline of GCaMP3 fluorescence in the conjunctiva explant. (C) Increased GCaMP3 fluorescence upon 2 mM histamine stimulation. Arrows indicate activated MrgprA3<sup>+</sup> sensory fibers. (D) Dynamics of GCaMP3 fluorescence upon histamine stimulation in MrgprA3<sup>+</sup> sensory fibers from (C). Representative images were chosen from 5 conjunctival explants imaged from 3 mice. Scale bars: 50  $\mu$ m.



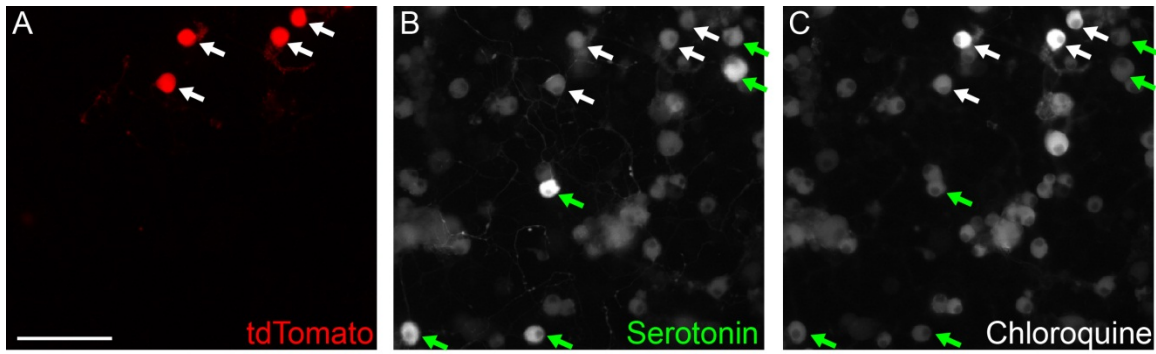

**Fig. S7:**  $MrgprA3^+$  DRG neurons respond to chloroquine but not serotonin. (A) DRG neurons cultured from  $Mrgpra3^{cre/+}$ ;  $Rosa26^{tdTomato/+}$ ;  $Pirt^{GCaMP3/+}$  mice. White arrows indicate  $MrgprA3^+$  DRG neurons. (B) Increased GCaMP3 fluorescence upon 10  $\mu$ M serotonin stimulation. (C) Increased GCaMP3 fluorescence upon 1 mM chloroquine stimulation. Green arrows indicate serotonin-sensitive neurons, which do not express  $MrgprA3$  and are insensitive to chloroquine. The experiment was repeated independently three times with similar results. Scale bars: 100  $\mu$ m.

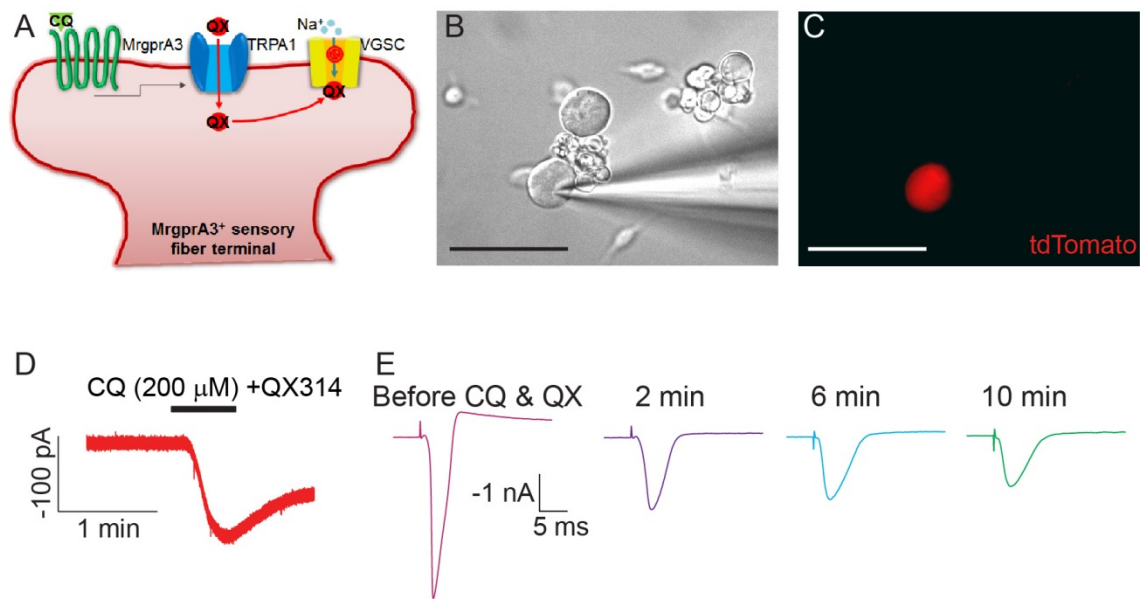

**Fig. S8:** Chloroquine-mediated entry of QX-314 decreases inward sodium current in MrgprA3<sup>+</sup> neurons. **(A)** Diagram depicting the action model of QX-314 in MrgprA3<sup>+</sup> neurons. **(B)** Representative photomicrograph of a recorded sensory neuron from *Mrgpra3*<sup>gfp-cre/+</sup>; *Rosa26*<sup>tdTomato/+</sup> (*Mrgpra3*<sup>tdTomato/+</sup>) mice. **(C)** The presence of tdTomato (red) indicates that the recorded neuron is MrgprA3<sup>+</sup>. Scale bars: 100 μm. **(D)** Inward currents triggered by application of chloroquine and QX-314 **(E)** Representative traces of inward sodium current recorded before and after application of CQ and QX-314.

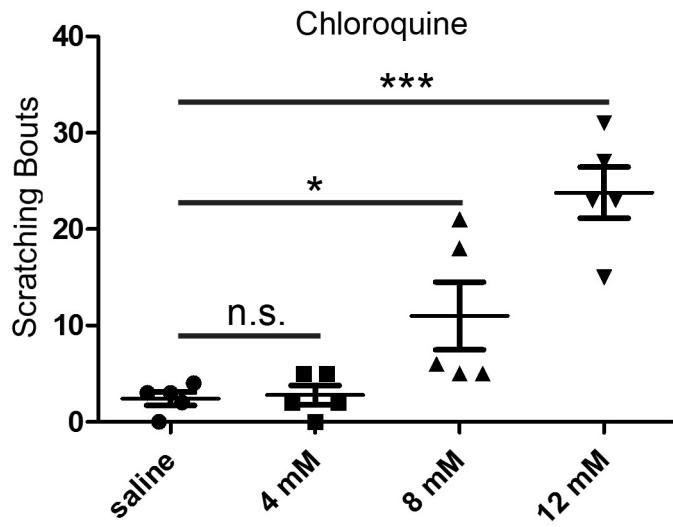

**Fig. S9:** Dose-dependent ocular scratching behavior evoked by topical chloroquine application in the conjunctiva sac of WT mice (n=5/group). All data are expressed as mean±s.e.m. Statistical analysis by two tailed Student's *t*-test (4 mM vs. saline, P=0.744; 8 mM vs. saline, \*P=0.04; 12 mM vs. saline, \*\*\*P=0.0009).

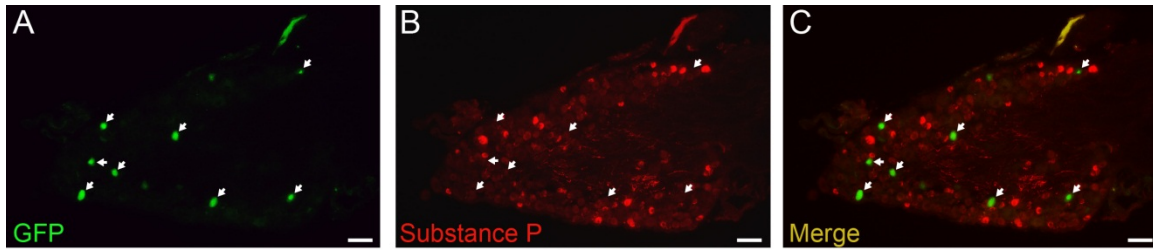

**Fig. S10:** MrgprA3<sup>+</sup> neurons do not express substance P. **(A)** DRG section of *Mrgpra3<sup>gfp-cre/+</sup>* mouse. **(B)** Immunofluorescence of substance P. **(C)** Merged image of **(A)** and **(B)**. Arrows indicate MrgprA3<sup>+</sup> DRG neurons, which do not overlap with substance P immunofluorescence signals. Representative images were chosen from DRGs imaged from 3 mice. Scale bars: 50  $\mu$ m.
